# Supplementary material for: The Baboon Kidney Transcriptome: Analysis of Transcript Sequence, Splice Variants, and Abundance
Source: PLoS One. 2013 Apr 23;8(4):e57563. doi: 10.1371/journal.pone.0057563 (PMC3634053; doi:10.1371/journal.pone.0057563)
Supplement: Table S18 — Significant canonical pathways identified from top 800 transcripts in baboon kidney RNA-Seq dataset. This table includes the –log(p-value), ratio, and molecules for each canonical pathway from the IPA Knowledge Base identified as being significant in the baboon kidney dataset. (XLSX) [file pone.0057563.s018.xlsx]

## Sheet: Additional file 18
Ingenuity Canonical Pathways	-log(p-value)	Ratio	Molecules
Oxidative Phosphorylation	19.4	0.474	COX7B,SDHB,ATP6V0B,ATP6V1D (includes EG:299159),ATP6V0C,UQCRHL,COX8A,ATP5L,ATP5G2,ATP6AP1,NDUFA1,NDUFA2,NDUFS1,NDUFB9,ATP6V1F,ATP5G1,NDUFS6,UQCRFS1,NDUFS2,ATP6V1G1,ATP5F1,ATP5I,ATP5G3,COX4I1,NDUFA8,NDUFS4,SDHA (includes EG:157074),NDUFS7,ATP5A1,NDUFS3,NDUFA13,ATP5C1,ATP5B,ATP5E,UQCRC2,NDUFB7,ATP6V0D1,COX5A (includes EG:12858),NDUFA12,CYC1,UQCRC1,ATP6V0E1,ATP6V1B2,NDUFA7,ATP6V1B1
Mitochondrial Dysfunction	16.3	0.433	HSD17B10,COX7B,SDHB,FURIN,PRDX5,COX8A,NCSTN,PSENEN,APP,NDUFA2,NDUFB9,MAOB,NDUFS1,SOD2,PARK7,NDUFS6,UQCRFS1,NDUFS2,GPX4,OGDH,COX4I1,NDUFS4,NDUFA8,SDHA (includes EG:157074),NDUFS7,ATP5A1,NDUFS3,NDUFA13,ATP5C1,FIS1 (includes EG:288584),PRDX3,ATP5B,NDUFB7,UQCRC2,CAT,COX5A (includes EG:12858),NDUFA12,CYC1,UQCRC1,NDUFA7,MAOA,PINK1
Valine, Leucine and Isoleucine Degradation	8.09	0.435	HSD17B10,ACAT2,ACADSB,PCCB,ALDH9A1,ACADS,HSD17B8,HADHB,ALDH2,ALDH1A1,PCCA,ACADVL,HIBADH,BCKDHA,ACAT1,MCEE,OXCT1,AOX1,IVD,HSD17B4
Arginine and Proline Metabolism	7.85	0.442	P4HB,OAT,ASS1,SAT1,GLUD1,ALDH9A1,CKB,DAO,ALDH2,MAOB,ALDH1A1,GAMT,BCKDHA,GOT1,HOGA1,ABP1 (includes EG:26),ASL,GATM,MAOA
Citrate Cycle	6.85	0.542	SDHA (includes EG:157074),SDHB,ACO2 (includes EG:11429),PCK1 (includes EG:18534),MDH1,IDH1,SUCLG1,DLST,DLD,IDH2,FH,MDH2 (includes EG:17448),OGDH
Ubiquinone Biosynthesis	6.35	0.421	NDUFS7,NDUFA1,NDUFS3,NDUFA2,NDUFA13,NDUFB9,PRMT1,NDUFS1,BCKDHA,NDUFB7,NDUFS6,NDUFA12,NDUFS2,NDUFA7,NDUFS4,NDUFA8
Tyrosine Metabolism	6.31	0.441	HSD17B10,MIF,DDT,DDC,ADH1C,ALDH1L1,HGD,FAH,MAOB,PRMT1,BCKDHA,GOT1,AOX1,ABP1 (includes EG:26),MAOA
EIF2 Signaling	5.98	0.281	PPP1CC,EIF1,PPP1CB,EIF4A2,RPS21,RPL37A,SHC1 (includes EG:20416),EIF4G2,EIF3D,RPS16,EIF3A,RPL19,RPL35,RPLP2,RPS3,PPP1CA,RPL18,PABPC1,RPL3,RPL27,RPL30,FAU,RPS4X,RPS5,EIF3I,EIF3K,RPS14
Tryptophan Metabolism	5.72	0.318	HSD17B10,AADAT,ACAT2,DDC,HAAO,CYP2D6,ALDH9A1,HSD17B8,HADHB,ALDH2,PRMT1,MAOB,ALDH1A1,BCKDHA,CAT,ACAT1,AOX1,OGDH,ABP1 (includes EG:26),HSD17B4,MAOA
Glutathione Metabolism	5.67	0.424	MGST1,GSTM5,GPX1 (includes EG:14775),GSS,GSTO1,PRDX6,A2LD1,IDH1,GPX3,OPLAH,GSTT1,IDH2,GPX4,MGST3
Pyruvate Metabolism	5.65	0.381	PKM2,AKR7A2,AKR7A3,ACAT2,PCK1 (includes EG:18534),MDH1,LDHB,ALDH9A1,GRHPR,ALDH2,ALDH1A1,BCKDHA,DLD,ACAT1,MDH2 (includes EG:17448),ACSL1
Glycolysis/Gluconeogenesis	5.6	0.362	PKM2,HSD17B10,ADH1C,GAPDH,ALDH1L1,TPI1,ALDH9A1,GALM,LDHB,ALDH2,ALDH1A1,ALDOB,DLD,FBP1,ALDOA,G6PC,ACSL1
Propanoate Metabolism	5.56	0.395	ACAT2,SLC27A2,ACADSB,PCCB,ALDH9A1,LDHB,ALDH2,HADHB,ALDH1A1,PCCA,ACADVL,SUCLG1,ACAT1,MCEE,ACSL1
Phenylalanine Metabolism	5.18	0.478	MAOB,MIF,PRDX5,PRDX1,DDC,ALDH1L1,GOT1,ABP1 (includes EG:26),PRDX6,MAOA,PRDX2
Butanoate Metabolism	4.93	0.357	HSD17B10,SDHA (includes EG:157074),SDHB,ACAT2,DCXR,PRDX6,ALDH9A1,ACADS,HSD17B8,ALDH2,HADHB,ALDH1A1,ACAT1,OXCT1,HSD17B4
Antigen Presentation Pathway	4.78	0.529	CALR,PSMB5,PDIA3,HLA-B,HLA-DRB1,CANX,CD74,PSMB6,HLA-C
Fatty Acid Metabolism	4.4	0.274	HSD17B10,ACAT2,SLC27A2,ACOX2,ADH1C,CYP2D6,ACADSB,ALDH9A1,ECI1,ACADS,HSD17B8,HADHB,ALDH2,ALDH1A1,ACADVL,ACAT1,CPT2,HSD17B4,ACSL1,CYP4A11
Glycine, Serine and Threonine Metabolism	4.12	0.342	PDIA3,DMGDH,GRHPR,DAO,MAOB,GAMT,PHGDH,DLD,GOT1,CTH,ABP1 (includes EG:26),GATM,MAOA
Histidine Metabolism	3.77	0.385	CNDP1,ALDH2,MAOB,PRMT1,ALDH1A1,DDC,ALDH1L1,ABP1 (includes EG:26),ALDH9A1,MAOA
Lysine Degradation	3.6	0.324	HSD17B10,ALDH2,HADHB,AADAT,ALDH1A1,ACAT2,DLST,ACAT1,OGDH,HSD17B4,ALDH9A1,HSD17B8
Urea Cycle and Metabolism of Amino Groups	3.43	0.421	CKB,GAMT,ASS1,OAT,CAT,GLUD1,GATM,ASL
Stilbene, Coumarine and Lignin Biosynthesis	3.42	0.545	PRDX5,KL,PRDX1,BCKDHA,PRDX6,PRDX2
Î²-alanine Metabolism	3.2	0.36	CNDP1,ALDH2,HADHB,ALDH1A1,ACADVL,ACADSB,ABP1 (includes EG:26),ALDH9A1,UPB1
Selenoamino Acid Metabolism	3.18	0.438	SEPHS2,PRMT1,AHCYL1,MAT2B,MAT2A,CTH,AHCY
Methane Metabolism	2.96	0.556	PRDX5,PRDX1,CAT,PRDX6,PRDX2
Methionine Metabolism	2.93	0.462	AHCYL1,MAT2B,MAT2A,CTH,BHMT2,AHCY
Regulation of eIF4 and p70S6K Signaling	2.79	0.216	PABPC1,EIF4EBP2,EIF1,EIF4A2,RPS21,PAIP2,PPP2CB,SHC1 (includes EG:20416),FAU,RPS4X,EIF4G2,RPS5,EIF3D,RPS16,EIF3I,EIF3A,RPS3,RPS14,EIF3K
Glyoxylate and Dicarboxylate Metabolism	2.73	0.429	GRHPR,HAO2,ACO2 (includes EG:11429),HOGA1,MDH1,MDH2 (includes EG:17448)
NRF2-mediated Oxidative Stress Response	2.53	0.189	AKR7A2,AKR7A3,RBX1,MGST1,SOD1,GSTM5,PRDX1,PPIB,ACTB,MAF,HERPUD1,ACTG1,GSTO1,GSTT1,HMOX1,SOD2,ERP29,CAT,VCP,CCT7,AOX1,CBR1,MGST3,FTH1 (includes EG:14319)
Serotonin Receptor Signaling	2.47	0.455	MAOB,DDC,SPR (includes EG:20751),QDPR,MAOA
Clathrin-mediated Endocytosis Signaling	2.38	0.193	ACTR2,APOE,AP2M1,APOM,VEGFB,ACTB,RAB7A,TSG101,ACTG1,AP2S1,HSPA8,ACTR3,RAB11B,ARPC2,CLTA,RAB5C,RAB11A,DAB2,ARPC1A,UBC,RBP4
Inositol Metabolism	2.37	0.75	ALDOB,ALDOA,TPI1
Ascorbate and Aldarate Metabolism	2.28	0.417	ALDH2,ALDH1A1,BCKDHA,ALDH9A1,GSTO1
Lipid Antigen Presentation by CD1	2.22	0.5	CALR,PDIA3,PSAP,CANX
Folate Biosynthesis	2.22	0.5	GGH,SPR (includes EG:20751),ALPL,QDPR
Pentose and Glucuronate Interconversions	2.13	0.304	AKR7A2,AKR7A3,UGT1A6,UGT2B7,BCKDHA,CRYL1,DCXR
Intrinsic Prothrombin Activation Pathway	2.1	0.385	COL1A2,COL1A1,KLK1,COL18A1,COL3A1
Metabolism of Xenobiotics by Cytochrome P450	2.05	0.222	HSD17B10,GSTT1,MGST1,AKR1C3,GSTM5,UGT1A6,UGT2B7,ADH1C,ALDH1L1,CYP2D6,GSTO1,MGST3
Regulation of Actin-based Motility by Rho	2.02	0.229	ACTR2,ACTR3,PFN1,CFL1,RHOB,ARPC2,ACTB,RHOA,PPP1CB,ARPC1A,ARHGDIA
Fructose and Mannose Metabolism	1.99	0.267	AKR7A2,AKR7A3,PMM1,KHK,ALDOB,FBP1,ALDOA,TPI1
Polyamine Regulation in Colon Cancer	1.95	0.357	PSME1,SAT1,OAZ1 (includes EG:18245),OAZ2,CTNNB1
Dopamine Receptor Signaling	1.72	0.217	PPP1CC,PPP2CB,MAOB,DDC,PPP1CB,SPR (includes EG:20751),PPP1CA,QDPR,MAOA,PRKAR1A
Neuroprotective Role of THOP1 in Alzheimer's Disease	1.65	0.273	MME,YWHAE,HLA-B,APP,HLA-C,PRKAR1A
OX40 Signaling Pathway	1.56	0.261	BCL2L1,RELA,NFKBIA,HLA-B,HLA-DRB1,HLA-C
GABA Receptor Signaling	1.56	0.261	AP2M1,GABARAP,SLC6A13,UBC,ALDH9A1,AP2S1
PI3K/AKT Signaling	1.51	0.179	RELA,YWHAE,YWHAH,YWHAB,GDF15,ILK,CCND1,PPP2CB,SHC1 (includes EG:20416),BCL2L1,HSP90B1,NFKBIA,HSP90AB1,CTNNB1
Aryl Hydrocarbon Receptor Signaling	1.5	0.172	RELA,MGST1,GSTM5,ALDH1L1,CCND1,ALDH9A1,GSTO1,AIP,CTSD,GSTT1,HSP90B1,ALDH1A1,HSP90AB1,NEDD8,MGST3,HSPB1
RhoGDI Signaling	1.5	0.172	GDI1,ACTR2,ARHGEF12,CFL1,ACTB,GNB2L1,ACTG1,GNAI2,ACTR3,RHOB,RHOA,ARPC2,EZR,ARPC1A,ARHGDIA,CDH16
Bile Acid Biosynthesis	1.49	0.233	HSD17B10,ALDH2,HADHB,ALDH1A1,CYP27A1,ADH1C,ALDH9A1
Mechanisms of Viral Exit from Host Cells	1.47	0.25	ACTB,PDCD6IP,CHMP4B,ACTG1,TSG101,VPS4A
Glycerolipid Metabolism	1.33	0.189	AKR7A2,HSD17B10,AKR7A3,ALDH2,ALDH1A1,PPAP2A,PPAP2B,ADH1C,AGPAT6,ALDH9A1
mTOR Signaling	1.3	0.158	VEGFB,EIF4A2,RPS21,PPP2CB,HMOX1,FAU,RPS4X,RHOB,EIF4G2,RPS5,EIF3D,RHOA,RPS16,EIF3I,EIF3A,RPS3,RPS14,EIF3K
Fatty Acid Elongation in Mitochondria	1.29	0.286	HSD17B10,HADHB,HSD17B4,HSD17B8
C21-Steroid Hormone Metabolism	1.29	0.286	EBP,AKR1C3,HSD11B2,CYP2D6
Oncostatin M Signaling	1.29	0.25	SHC1 (includes EG:20416),EPAS1,MT2A,STAT3,PLAU
Androgen and Estrogen Metabolism	1.28	0.2	HSD17B10,EBP,PRMT1,UGT1A6,UGT2B7,HSD11B2,HSD17B4,HSD17B8
Arachidonic Acid Metabolism	1.25	0.177	GSTT1,GPX3,AKR1C3,GPX1 (includes EG:14775),CYP2D6,PTGDS,GPX4,CYP4A11,CBR1,PRDX6,MGST3
Synthesis and Degradation of Ketone Bodies	1.22	0.333	ACAT2,ACAT1,OXCT1
RhoA Signaling	1.19	0.169	ACTR2,ARHGEF12,ACTR3,PFN1,CFL1,ARPC2,EZR,ACTB,RHOA,PPP1CB,ARPC1A,ACTG1
Galactose Metabolism	1.13	0.227	AKR7A2,AKR7A3,GALK1,G6PC,GANAB
Telomere Extension by Telomerase	1.1	0.3	XRCC6,HNRNPA2B1,XRCC5
Protein Ubiquitination Pathway	1.1	0.141	PSMB4,RBX1,CRYAB,PSMB5,PSMA7,HSPA9,PSMC4,PSMB6,PSMD8,HSPA8,PSMB7,HSP90B1,PSME1,HSP90AB1,PSMB2,PSMD2,PSMB1,HLA-B,UBA1,UBC,PSMC2,AMFR,HLA-C,HSPB1
Nitrogen Metabolism	1.07	0.217	CA2,CA4,CA12,GLUD1,CTH
FcÎ³ Receptor-mediated Phagocytosis in Macrophages and Monocytes	1.03	0.167	HMOX1,ACTR2,ACTR3,RAB11B,ARPC2,EZR,ACTB,RAB11A,ARPC1A,ACTG1
Caveolar-mediated Endocytosis Signaling	1.03	0.178	ACTB,RAB5C,COPE,HLA-B,FLOT1,ACTG1,HLA-C,COPG
Integrin Signaling	1.02	0.145	ACTR2,ACTB,ILK,PPP1CB,ACTG1,SHC1 (includes EG:20416),ARF1,ACTR3,ARF5,CAPNS1,RHOB,ARF3,ARPC2,RHOA,GRB7,ARPC1A,CAPN2,ACTN4
D-arginine and D-ornithine Metabolism	0.979	1	DAO
Actin Cytoskeleton Signaling	0.966	0.143	ACTR2,ARHGEF12,PFN1,TMSB10/TMSB4X,CFL1,ACTB,BRK1,PPP1CB,ACTG1,SHC1 (includes EG:20416),ACTR3,EZR,RHOA,ARPC2,MYH9,ARPC1A,ACTN4,NCKAP1
Purine Metabolism	0.95	0.138	PKM2,ATP1B1,ATP5A1,AK3,ATP5L,PSMC4,ATP5G2,POLD4,ATP5C1,IMPDH2,ATP5B,ATP5G1,BCKDHA,VCP,MYH9,AK4,AOX1,PSMC2,ATP5F1,ATP5G3,POLD2,ATP5I
Xenobiotic Metabolism Signaling	0.917	0.135	RELA,RBX1,MGST1,UGT1A6,GSTM5,MAF,ALDH1L1,CES1,GSTO1,ALDH9A1,AIP,GSTT1,PPP2CB,HMOX1,MAOB,HSP90B1,ALDH1A1,HSP90AB1,UGT2B7,CAT,CITED2,MGST3,MAOA
Cell Cycle Regulation by BTG Family Proteins	0.882	0.211	PPP2CB,PRMT1,BTG1,CCND1
Alanine and Aspartate Metabolism	0.882	0.211	ASS1,DLD,GOT1,ASL
ILK Signaling	0.874	0.143	RELA,VEGFB,TMSB10/TMSB4X,CFL1,ACTB,ILK,CCND1,ACTG1,PPP2CB,RHOB,PPAP2B,RHOA,MYH9,ACTN4,CTNNB1
Glutamate Metabolism	0.834	0.185	GLUD1,GOT1,QARS,GSS,GSTO1
Amyotrophic Lateral Sclerosis Signaling	0.825	0.155	BCL2L1,SOD1,VEGFB,CAPNS1,CAT,RAB5C,GPX1 (includes EG:14775),CAPN2,SSR4
IGF-1 Signaling	0.771	0.145	SHC1 (includes EG:20416),IGFBP4,CTGF,YWHAE,YWHAH,YWHAB,IGFBP5,IGFBP7,STAT3,IGFBP2,PRKAR1A
Pentose Phosphate Pathway	0.764	0.19	ALDOB,TALDO1,FBP1,ALDOA
Autoimmune Thyroid Disease Signaling	0.756	0.214	HLA-B,HLA-DRB1,HLA-C
VEGF Signaling	0.727	0.151	SHC1 (includes EG:20416),BCL2L1,VEGFB,YWHAE,ACTB,EIF1,ACTN4,ACTG1
Retinol Metabolism	0.712	0.182	ALDH1A1,UGT1A6,UGT2B7,ADH1C
D-glutamine and D-glutamate Metabolism	0.701	0.5	GLUD1
DNA Double-Strand Break Repair by Non-Homologous End Joining	0.695	0.25	XRCC6,XRCC5
Crosstalk between Dendritic Cells and Natural Killer Cells	0.691	0.158	RELA,ACTB,HLA-B,HLA-DRB1,ACTG1,HLA-C
Amyloid Processing	0.691	0.158	CAPNS1,NCSTN,PSENEN,CAPN2,APP,PRKAR1A
Virus Entry via Endocytic Pathways	0.667	0.145	AP2M1,CLTA,ACTB,HLA-B,CXADR,ACTG1,AP2S1,HLA-C
Germ Cell-Sertoli Cell Junction Signaling	0.626	0.131	TUBB4B,ACTB,CTNNA1,ILK,ACTG1,TGFBR2,TUBA1A,RHOB,PPAP2B,RHOA,ACTN4,CTNNB1,A2M
Atherosclerosis Signaling	0.622	0.138	COL1A2,COL1A1,APOE,RELA,APOM,COL18A1,PRDX6,COL3A1,RBP4
Aminophosphonate Metabolism	0.616	0.222	PRMT1,BCKDHA
Allograft Rejection Signaling	0.582	0.176	HLA-B,HLA-DRB1,HLA-C
MIF-mediated Glucocorticoid Regulation	0.578	0.16	RELA,MIF,NFKBIA,CD74
Actin Nucleation by ARP-WASP Complex	0.56	0.143	ACTR2,ACTR3,RHOB,ARPC2,RHOA,ARPC1A
Glycerophospholipid Metabolism	0.55	0.132	HMOX1,PPAP2A,GPD1,PDIA3,CDIPT,PPAP2B,GOT1,AGPAT6,PRDX6
Role of JAK1, JAK2 and TYK2 in Interferon Signaling	0.548	0.2	RELA,STAT3
Notch Signaling	0.535	0.167	FURIN,NCSTN,PSENEN
Complement System	0.535	0.167	C1R,CFI,C1QB
Neuregulin Signaling	0.535	0.133	SHC1 (includes EG:20416),HSP90B1,HSP90AB1,DCN,GRB7,ERBB3,ERRFI1,ERBB2
TR/RXR Activation	0.535	0.133	AKR1C3,GPS2,SREBF2,DIO1,NCOA4,G6PC,PCK1 (includes EG:18534),TBL1XR1
Sertoli Cell-Sertoli Cell Junction Signaling	0.529	0.124	SPTBN1,CLDN15,TUBB4B,ACTB,CTNNA1,ILK,ACTG1,TUBA1A,PPAP2B,CLDN2,ACTN4,CTNNB1,A2M,PRKAR1A
LPS/IL-1 Mediated Inhibition of RXR Function	0.525	0.121	APOE,MGST1,SLC27A2,GSTM5,ACOX2,ALDH1L1,GSTO1,ALDH9A1,GSTT1,MAOB,ALDH1A1,CAT,CPT2,ACSL1,CYP4A11,MGST3,MAOA
Breast Cancer Regulation by Stathmin1	0.496	0.122	PPP1CC,ARHGEF12,CALM1 (includes others),TUBB4B,GNB2L1,PPP1CB,TSG101,GNAI2,PPP2CB,SHC1 (includes EG:20416),TUBA1A,RHOA,PPP1CA,PRKAR1A
Graft-versus-Host Disease Signaling	0.493	0.158	HLA-B,HLA-DRB1,HLA-C
fMLP Signaling in Neutrophils	0.486	0.127	GNAI2,ACTR2,RELA,ACTR3,NFKBIA,CALM1 (includes others),ARPC2,GNB2L1,ARPC1A
Cdc42 Signaling	0.486	0.127	ACTR2,ACTR3,CFL1,ARPC2,HLA-B,HLA-DRB1,PPP1CB,ARPC1A,HLA-C
Rac Signaling	0.486	0.127	ACTR2,RELA,ACTR3,CFL1,ARPC2,RHOA,BRK1,ARPC1A,NCKAP1
Agrin Interactions at Neuromuscular Junction	0.478	0.133	ACTB,LAMB1,ERBB3,ERBB2,AGRN,ACTG1
Endometrial Cancer Signaling	0.46	0.135	CTNNA1,ILK,ERBB2,CTNNB1,CCND1
Starch and Sucrose Metabolism	0.46	0.135	UGT1A6,KL,UGT2B7,G6PC,GANAB
Production of Nitric Oxide and Reactive Oxygen Species in Macrophages	0.448	0.119	PPP1CC,APOE,RELA,APOM,PPP1CB,PPP2CB,NFKBIA,RHOB,RHOA,CYBA,CAT,PPP1CA,RBP4
Androgen Signaling	0.447	0.123	GNAI2,SHC1 (includes EG:20416),CALR,RELA,CALM1 (includes others),GNB2L1,NCOA4,CCND1,PRKAR1A
Maturity Onset Diabetes of Young (MODY) Signaling	0.439	0.167	ALDOB,GAPDH
RAN Signaling	0.439	0.167	RANBP2,RAN
Signaling by Rho Family GTPases	0.436	0.117	ACTR2,RELA,ARHGEF12,CFL1,ACTB,GNB2L1,ACTG1,GNAI2,ACTR3,RHOB,RHOA,ARPC2,EZR,ARPC1A,CDH16
Cytotoxic T Lymphocyte-mediated Apoptosis of Target Cells	0.419	0.143	HLA-B,HLA-DRB1,HLA-C
Tight Junction Signaling	0.416	0.118	TGFBR2,PPP2CB,RELA,CLDN15,ACTB,RHOA,CTNNA1,MYH9,CLDN2,CTNNB1,ACTG1,PRKAR1A
Semaphorin Signaling in Neurons	0.411	0.133	ARHGEF12,CFL1,RHOB,RHOA
Pancreatic Adenocarcinoma Signaling	0.409	0.121	TGFBR2,HMOX1,BCL2L1,RELA,VEGFB,STAT3,ERBB2,CCND1
Estrogen-Dependent Breast Cancer Signaling	0.385	0.125	HSD17B10,RELA,CCND1,HSD17B4,HSD17B8
Cell Cycle: G2/M DNA Damage Checkpoint Regulation	0.384	0.129	GADD45A,YWHAE,YWHAH,YWHAB
Lysine Biosynthesis	0.371	0.2	AADAT
CDK5 Signaling	0.37	0.119	PPP1CC,PPP2CB,EGR1,LAMB1,PPP1CB,PPP1CA,PRKAR1A
Dendritic Cell Maturation	0.361	0.115	COL1A2,COL1A1,RELA,NFKBIA,HLA-B,HLA-DRB1,COL18A1,COL3A1,HLA-C
p70S6K Signaling	0.361	0.115	GNAI2,PPP2CB,SHC1 (includes EG:20416),YWHAE,YWHAH,PDIA3,YWHAB,EEF2,BCAP31
MIF Regulation of Innate Immunity	0.359	0.125	RELA,MIF,NFKBIA,CD74
Hepatic Fibrosis / Hepatic Stellate Cell Activation	0.355	0.113	COL1A2,TGFBR2,COL1A1,IGFBP4,RELA,VEGFB,CTGF,MYH9,IGFBP5,A2M,COL3A1
Prostate Cancer Signaling	0.329	0.115	RELA,HSP90B1,NFKBIA,HSP90AB1,CTNNB1,CCND1
MSP-RON Signaling Pathway	0.329	0.125	KLK1,ACTB,ACTG1
Induction of Apoptosis by HIV1	0.322	0.116	BCL2L1,RELA,SLC25A4,NFKBIA,SLC25A3
Eicosanoid Signaling	0.314	0.118	DPEP1,AKR1C3,PTGDS,PRDX6
Acute Phase Response Signaling	0.31	0.109	C1R,SHC1 (includes EG:20416),HMOX1,RELA,SOD2,NFKBIA,SERPINF1,STAT3,RBP5,A2M,HRG,RBP4
Glutamate Receptor Signaling	0.304	0.12	CALM1 (includes others),SLC17A1,SLC1A1
Cellular Effects of Sildenafil (Viagra)	0.304	0.111	CALM1 (includes others),PDIA3,ACTB,MYH9,PPP1CB,ACTG1,PRKAR1A
IL-10 Signaling	0.304	0.114	HMOX1,RELA,NFKBIA,BLVRA,STAT3
CTLA4 Signaling in Cytotoxic T Lymphocytes	0.304	0.114	PPP2CB,AP2M1,CLTA,HLA-DRB1,AP2S1
FXR/RXR Activation	0.295	0.111	APOE,MLXIPL,CYP27A1,FBP1,G6PC,SLC22A7
Chemokine Signaling	0.286	0.111	GNAI2,CALM1 (includes others),CFL1,RHOA,PPP1CB
GM-CSF Signaling	0.286	0.111	SHC1 (includes EG:20416),BCL2L1,GNB2L1,STAT3,CCND1
CD28 Signaling in T Helper Cells	0.283	0.108	ACTR2,RELA,ACTR3,NFKBIA,CALM1 (includes others),ARPC2,HLA-DRB1,ARPC1A
Docosahexaenoic Acid (DHA) Signaling	0.281	0.115	BCL2L1,SERPINF1,APP
eNOS Signaling	0.278	0.107	HSPA8,HSP90B1,VEGFB,CALM1 (includes others),HSP90AB1,HSPA9,AQP1,AQP2,PRKAR1A
IL-15 Signaling	0.274	0.111	SHC1 (includes EG:20416),BCL2L1,RELA,STAT3
O-Glycan Biosynthesis	0.268	0.143	GALNT11
Fatty Acid Biosynthesis	0.268	0.143	BTD
N-Glycan Degradation	0.263	0.118	FUCA1,MAN2B1
Coagulation System	0.263	0.118	PLAU,A2M
Phospholipid Degradation	0.254	0.106	HMOX1,PPAP2A,PDIA3,PPAP2B,PRDX6
nNOS Signaling in Neurons	0.24	0.107	CAPNS1,CALM1 (includes others),CAPN2
Cysteine Metabolism	0.24	0.107	GOT1,CTH,LDHB
IL-9 Signaling	0.238	0.111	RELA,STAT3
Cyanoamino Acid Metabolism	0.23	0.125	KL
Role of RIG1-like Receptors in Antiviral Innate Immunity	0.216	0.105	RELA,NFKBIA
TNFR2 Signaling	0.216	0.105	RELA,NFKBIA
B Cell Development	0.2	0.111	HLA-DRB1
Phenylalanine, Tyrosine and Tryptophan Biosynthesis	0.2	0.111	GOT1
One Carbon Pool by Folate	0.2	0.111	ALDH1L1
